# Supplementary material
Source: MDPI journal article supplement (https://www.mdpi.com/2073-4395/8/5/58)
Supplement: s1 [file s1]

|             |                                                                       |
|-------------|-----------------------------------------------------------------------|
| pPRATENSIS2 | <u>CCAGCTGTTCTCTGGTTTACCG</u> CTTATTGGAAATCTGCACCAGTTGAAAGAAAAGAAGCCC |
| pCOMPRESSA  | CCAGCTGTTCTCTGGTTTACCGCTTATTGGAAATCTGCACCAGTTGAAAGAAAAGAAGCCC         |
| pARACHNIF1  | CCAGCTGTTCTCTGGTTTACCGCTTATTGGAAATCTGCACCAGTTGAAAGAAAAGAAGCCC         |
| pTRIVIALIS  | CCAGCTGTTCTCTGGTTTACCGATTATTGGAAATCTGCACCAGTTGAAAGAGAAGAAGCCC         |
| pARACHNIF2  | CCAGCTGTTCTCTGGTTTACCGCTTATTGGGAAATCTGCACCAGTTGAAAGAAAAGAAGCCC        |
| pPRATENSIS1 | CCAGCTGTTCTCTGGTTTACCGCTTATTGGAAATCTGCACCAGTTGAAAGAAAAGAAGCCC         |
| pANNUA1     | CCAGCTGTTCTCTGGTTTACCGCTTATTGGAAACCTGCACCAGTTGAAAGAAAAGAAGCCC         |
| pINFIRMA    | CCAGCTGTTCTCTGGTTTACCGCTTATTGGAAATCTGCACCAGCTGAAAGAAAAGAAACCC         |
| pANNUA2     | CCAGCTGTTCTCTGGTTTACCGCTTATTGGAAATCTGCACCAGCTGAAAGAAAAGAAACCC         |
| pSUPINA     | CCAGCTGTTCTCTGGTTTACCCCTTATTGGAAACTTGCACCAGTTGAAAGAAAAGAAGCCC         |

**KO-F**

|             |                                                              |
|-------------|--------------------------------------------------------------|
| pPRATENSIS2 | CATAAGACCTTTGCAAAATGGTCTGAAATTTATGGGCCAATATACACTATAAAGACTGGG |
| pCOMPRESSA  | CATAAGACCTTTGCAAAATGGTCTGAAATTTATGGGCCAATATACACTATAAAGACTGGG |
| pARACHNIF1  | CATAAGACCTTTGCAAAATGGTCTGAAATTTATGGGCCAATATACACTATAAAGACTGGA |
| pTRIVIALIS  | CATAAGACTTTTGCAAAATGGTCTGAAATCCATGGGCCAATATACACTATAAAGACTGGG |
| pARACHNIF2  | CATAAGACCTTTGCAAAATGGTCTGAAATTTATGGGCCAATATACACTATAAAGACTGGG |
| pPRATENSIS1 | CACAAGACCTTTGCAAAATGGTCTGAAATTTATGGGCCAATATACACTATAAAGACTGGG |
| pANNUA1     | CATAAGACATTTGCAAAATGGTCTGAAATTTATGGGCCAATATACACTATAAAGACTGGG |
| pINFIRMA    | CACAAGAGCTTTGCGAAATGGTCTGAAGTTTATGGGCCAATATACACTATAAAGATCGGG |
| pANNUA2     | CACAAGAGCTTTGCGAAATGNTCTGAAGTTTATGGGCCAATATACACTATAAAGATCGGG |
| pSUPINA     | CATAAGACATTTGCAAAATGGTCTGAAATTTATGGGCCAATATACACTATAAAGACTGGG |

|             |                                                                       |
|-------------|-----------------------------------------------------------------------|
| pPRATENSIS2 | GCATCAACTGTAG <u>CTGTGCTCAACTCGACAGAAGTA</u> GTGAAAGAGGta--atacggaaat |
| pCOMPRESSA  | GCATCAACTGTAGCTGTGCTCAACTCAACAGAAGTAGTGAAAGAGGta--atacggaaat          |
| pARACHNIF1  | ACATCAACTGTAGCTGTGCTCAACTCAACAGAAGTAGTGAAAGAGGta--atacggaaat          |
| pTRIVIALIS  | GCATCAACTGTAGCTGTGCTCAACTCAACAGAAGTAGCCAAGGAGGta--atacagaaat          |
| pARACHNIF2  | GCATCAACTGTAGCTGTGCTCAACTCAACAGAAGTAGCCAAGGAGGta--atacagaaat          |
| pPRATENSIS1 | GCATCAACTGTAGCTGTGCTCAACTCAACAGAAGTAGCCAAGGAGGta--atacagaaat          |
| pANNUA1     | GCATCAACTGTAGCTGTACTCAACTCAACAGAAGTAGCCAAGAGGta--atacggtaat           |
| pINFIRMA    | GCTTCATCTGTAGTTGTGCTCAATTCCACAGAAGTAGCCAAGGAGGtatggttatagtga          |
| pANNUA2     | GCTTCATCTGTAGTTGTGCTCAATTCCACAGAAGTAGCCAAGGAGGtatggttatagtga          |
| pSUPINA     | GCATCAACTGTAGCTGTGCTCAACTCAACAGAAGTAGCCAAGAGGta-atacggtaat            |

**TxKy-F**

|             |                                                                 |
|-------------|-----------------------------------------------------------------|
| pPRATENSIS2 | tcccacttctcatttgctattgataatatatat--tttatattggttctacagaatatctt   |
| pCOMPRESSA  | tcccacttctcatttccatttgtaatatatat--tttatattggttctacagaatatatt    |
| pARACHNIF1  | ccccatttctcatttgctattgataatatatatatttttatattggttctacagaatatatt  |
| pTRIVIALIS  | tcccatttttcatttccctattgatagtatatatt--tttatggttgctcctgcagaatacat |
| pARACHNIF2  | tcacatttttcatttccctattgatagtatatatt--tttatggttggtatgcagaatatatt |
| pPRATENSIS1 | tcccattttccatttccatttgatagtatatatt--tttatggttgctcctgtagagtatat  |
| pANNUA1     | tcccatatatcatctcctattgataacatatatt--tttatggttctccaacataatatctg  |
| pINFIRMA    | ctacaattagtagtttctgtct-----tattt--tggaaatta---aac-----          |
| pANNUA2     | ctacaattagtagtttctgtct-----tattt--tggaaatta---aac-----          |
| pSUPINA     | tcccatttatcatctcctattgataaaatatatt--ttcatggttgctccaac-----      |

|             |                                                               |
|-------------|---------------------------------------------------------------|
| pPRATENSIS2 | ta-----ctctggaaatttatt-----                                   |
| pCOMPRESSA  | ta-----ctctggaaatttagt-----                                   |
| pARACHNIF1  | tatttgcacatctgggttactctggaaattcagt-----                       |
| pTRIVIALIS  | tatttgcacatctgggttatttgggaaatttagt-----                       |
| pARACHNIF2  | tatttgcacatctgggttatttgggaaatttagt-----                       |
| pPRATENSIS1 | tattcgcacatctgggttatttgggaaatttagt-----                       |
| pANNUA1     | tatttgcactactgggttatttgggaaatttagtatttttaggccacgcttggttggtcgt |
| pINFIRMA    | -----ctgtagaatttttat-----                                     |
| pANNUA2     | -----ctgtagaatttttat-----                                     |
| pSUPINA     | -----atagtagtctttatt-----                                     |

|             |                                                              |
|-------------|--------------------------------------------------------------|
| pPRATENSIS2 | -----                                                        |
| pCOMPRESSA  | -----                                                        |
| pARACHNIF1  | -----                                                        |
| pTRIVIALIS  | -----                                                        |
| pARACHNIF2  | -----                                                        |
| pPRATENSIS1 | -----                                                        |
| pANNUA1     | ttacgaggccaaactggccggcgcaaaatacggacttggtatgatgacgctcaaattgcg |
| pINFIRMA    | -----                                                        |
| pANNUA2     | -----                                                        |
| pSUPINA     | -----                                                        |

|             |                                                             |
|-------------|-------------------------------------------------------------|
| pPRATENSIS2 | -----                                                       |
| pCOMPRESSA  | -----                                                       |
| pARACHNIF1  | -----                                                       |
| pTRIVIALIS  | -----                                                       |
| pARACHNIF2  | -----                                                       |
| pPRATENSIS1 | -----                                                       |
| pANNUA1     | gggcagttacacaccaagcgcaaagaaatatttcgctccgaattctgttccgacattcc |
| pINFIRMA    | -----                                                       |
| pANNUA2     | -----                                                       |
| pSUPINA     | -----                                                       |

|             |                                                               |
|-------------|---------------------------------------------------------------|
| pPRATENSIS2 | -----ttcttagtccttatgcatgggtttttgtaatatta---gttcatgtttactat    |
| pCOMPRESSA  | -----ttcttagtccttatgcatgggtttttgtaatatta---gttcatgtttactat    |
| pARACHNIF1  | -----ttcttagtccttctgcatgggtttttgtaatatta---gttcatgtttactat    |
| pTRIVIALIS  | -----cttgatgtccttctgcaagtggtttttgtaatattacctagttcatgtttactat  |
| pARACHNIF2  | -----cttgatgtccttctgcaagggtttttgtaatattacctagttcatgttactat    |
| pPRATENSIS1 | -----cttgatgttttctgcaagggtttttgtaattttacctagttcatgtttattct    |
| pANNUA1     | aagcgagcccttagtccttctacaagggtttttgtaatattacctagttcatgtttactat |
| pINFIRMA    | -----at---taatatgtcttagtacgtatttactat                         |
| pANNUA2     | -----at---taatatgtcttagtacgtatttactat                         |
| pSUPINA     | -----tgcaactacgggttatgtaatat-acctagttcgtgtttactat             |

|             |                                                                |
|-------------|----------------------------------------------------------------|
| pPRATENSIS2 | gtatgctttcgttgacatcatcttagcatttttatgtattttaagtggcaatataataaatt |
| pCOMPRESSA  | gtatgctttcgttgacatcatcttagcatttttatgtattttaagtggcaatataataaatt |
| pARACHNIF1  | gtatgctttcattgacatcatcttagcatttttatatttttaaatggcaatataataaatt  |
| pTRIVIALIS  | gtatgctttcattgaca---cttagcattttat-tcttctaaatggcagtataataaatt   |
| pARACHNIF2  | gtatgctttcattgaca---g-----aatt                                 |
| pPRATENSIS1 | gtatgctttcattgacattgtcttagcatttttat-tctttcaaatgtcagtataataaatt |
| pANNUA1     | gtatgctttcgttgacattatcttagcattttgt---ttataaaatgtaataataaatt    |
| pINFIRMA    | gcatgctttcatttacattatcttagcaaatac-tcctt-----cggtaat---tcttt    |
| pANNUA2     | gcatgctttcatttacattatcttagcaaatac-tcctt-----cggtaat---tcttt    |
| pSUPINA     | gtatgctttcgttgacattatcttagcat-tt-tatttatgaaatggtaataataaatt    |

|             |                                                                  |
|-------------|------------------------------------------------------------------|
| pPRATENSIS2 | caaacctacatacaagatttctttaagaaatac-aactttaacatgatatttatggtttgtc   |
| pCOMPRESSA  | caaacctacatacaagatttctttaagaaatac-aactttaacatgatatttatggtttgtc   |
| pARACHNIF1  | caaacctacttacaagatttctttaagagatc-agctttaacatgatatttatatttgcc     |
| pTRIVIALIS  | caaactctggataaaaagagttctgtgaagaaattgaagtttatcatgatagttatggtttgca |
| pARACHNIF2  | caaactctggataaaaagagttctgtgaagaaattgaagtt-atcatgatagttatggtttcc  |
| pPRATENSIS1 | caaactcggataaaaagagttttctaaaagattgatttttatcacgatagttatggtttgcc   |
| pANNUA1     | caaatacacatacaagagttctgca-----catgatagttacggtttacc               |
| pINFIRMA    | c-----tt--taca-----tatac---attcaagtttaacatgattgttactttgacc       |
| pANNUA2     | c-----tt--taca-----tacac---attcaagtttaacatgattgttactttgacc       |
| pSUPINA     | cgaatattgatacaagagttctgtgaagaaattaaaatttcacattatagttacggtttacc   |

|             |                                                                    |
|-------------|--------------------------------------------------------------------|
| pPRATENSIS2 | tatatattgtgtaatgctggagataaaa-tcaaaaatttctaagtgagttttctcacaataaaa   |
| pCOMPRESSA  | tatatattgtgtaatgctagagataaaa-tcaaaaatttctaagtgagttttctcacaataaaa   |
| pARACHNIF1  | tatatatttttctaagtgctggagataaaa-tcaagaatttctaagtgagttttctcacaataaaa |
| pTRIVIALIS  | tatatatttttcttatcctggagataaaa-tgaaggactctaagtgagttttctcacaataaaa   |
| pARACHNIF2  | tatatatttttctcatcctggagatgaa-tcaaggactctaagtgagcttttctcacaataaaa   |
| pPRATENSIS1 | tatatgttttctcatcctggagataaaa-tcaaggattataatgagttttctcacaataaaa     |
| pANNUA1     | tatatatttttctcatgttggagtcacaaatcaaggatttctaagtgagttttctcagaaattaa  |
| pINFIRMA    | tatatattttccgcgc--cggagataa-----ctcatgtatttttctccac-caaa           |
| pANNUA2     | tatatattttccgcgc--cggagataa-----ctcatgtatttttctccac-caaa           |
| pSUPINA     | tatatatttttctcatggtggagacaaa-ataatgatttctaagtgagtttttctcagaaataaaa |

|             |                                                              |
|-------------|--------------------------------------------------------------|
| pPRATENSIS2 | a--agtgattgaaatgtgctatgaattgacttctgttccgcaagaactacccaactaagc |
| pCOMPRESSA  | a--agtgattgaaatgtgctatgaattgacttctgttccgcaagaactacccaactaagc |
| pARACHNIF1  | a--agtgattgaaatgtgctatgaattgacctctgttccgcaagaactacccaatgaagc |
| pTRIVIALIS  | a--a-tggctgaaagttgctatggatttacctcttttctgcaa-aactacccaactaagc |
| pARACHNIF2  | a--aatgctgaaacgtgctatgaatttacctcttttctgcaagaactacccaactaagc  |
| pPRATENSIS1 | a--a-tgactgaaacgtccgatgaattgacctcttttctgcaagaactacccaactaagc |
| pANNUA1     | ataaatgattgaa-catgctatgaattgacctcgtttccgcaagaantacccaactaaga |
| pINFIRMA    | c---tgattgaaacaagatgtggcctgatat-atttttgcatgaactacccaactaagc  |
| pANNUA2     | c---tgattgaaacaagatgtggcctgatat-atttttgcatgaactacccaactaagc  |
| pSUPINA     | ta-aatgattgag-cgtgctatgaattgacctcgtttccgcaagaactacccaactaag- |

|             |                                                              |
|-------------|--------------------------------------------------------------|
| pPRATENSIS2 | --taaaaagtagaac-ggatttagtacacaaattatgcatatactttttt-agatgcata |
| pCOMPRESSA  | --taaaaagtagaac-ggatttagtacacaaattatgctatactttttttagatgcata  |
| pARACHNIF1  | --taaaaagtagaac-ggatttagtacacaaattatgcatat---ttttttagatgcata |
| pTRIVIALIS  | --taaaaagtagacc-ggatttagtacacaaaat-----tt----atgcata         |
| pARACHNIF2  | --taaaaagtagacc-ggatttagtcacaaaat-----tt----atgcatg          |
| pPRATENSIS1 | --taaaaagtagaca-ggatttagtacacaaaa-----tt----atgcata          |
| pANNUA1     | --taaaaagtagacc-agatttagtacacataatt-----atgcata              |
| pINFIRMA    | tataaaaaacatacccagttgagtacacaaatt-----atacata                |
| pANNUA2     | tataaaaaacatacccagttgagtacacaaatt-----atacata                |
| pSUPINA     | -ataaaaattagacc-agatttagtacacaaatt-----atgtaga               |

|             |                                                                        |
|-------------|------------------------------------------------------------------------|
| pPRATENSIS2 | taatttctt---gata <u>ttggctgtgatgcagaacagg</u> taaatgatagcacaatttcagaaa |
| pCOMPRESSA  | taatttctt---gatatcggtctgtgatgcagaacagataaatgatagcagaatttcagaaa         |
| pARACHNIF1  | tacttctt---gatattggctgtgatgcacaacagataaatgatagcagaatttcagaaa           |
| pTRIVIALIS  | tacttctt---gatatagactgcgacgcagaacagaaagattacagtagaatttgagaaa           |
| pARACHNIF2  | tactt-----gatattggctgcatgacagaacagagatattacagcagcatttcagaaa            |
| pPRATENSIS1 | tacttctt---gatattggctgcatgacagaacagagaaattacagcagcatttcagaaa           |
| pANNUA1     | tacttcttcntgatantgtctgcatgtagaacagataaatgatagcagcatttcagaaa            |
| pINFIRMA    | tggtcctt---catattgcctgtgatgcagaagagagaaatgatagcaacattgtaaaaa           |
| pANNUA2     | tggttctt---catattgcctgtgatgcagaagagagaaatgatagcaacattgcaaaaa           |
| pSUPINA     | tacttctt---gatattggctgtgatgtagaacagataaacgatagcagcatttcagaaa           |

**TxComp-R**

|             |                                                                        |
|-------------|------------------------------------------------------------------------|
| pPRATENSIS2 | tgtgtcacatttggatattgatttgcacaaaacataaattctg <u>tcctgtattttgc-aggca</u> |
| pCOMPRESSA  | tgtgtcacatttggatatttaatttgcacaaaacataaattatgtcctgtattttgc-aggca        |
| pARACHNIF1  | tgtgtcacatttggatatttaatttgcacaaaacataaattctgtcctgtattttgc-aggca        |
| pTRIVIALIS  | cgtatcacatttgaatgtcaatttacaagaacatatatcctgtcctgtattttgc-aggca          |
| pARACHNIF2  | tgtatcacatttgaatgtcaatttacaagaacatatatcctgtcctgtattttgc-aggca          |
| pPRATENSIS1 | tgtatcacatttgaatgtcaatttacaagaacatatatcctgtcctgtatatgc-aggca           |
| pANNUA1     | tgtgtcaaatttggatatttaatttgcacaaacatatatttctgtctgtatttttaggca           |
| pINFIRMA    | aatgccagctttgactataaatt-acaaacatacatatgttttctgtctattttac-aggca         |
| pANNUA2     | aatgccagctttgactataaatt-acaaacatacatatgttttctgtctattttac-aggca         |
| pSUPINA     | tgtgtcacatttggatatttaatttgcacaaacatatatttctgtctgtattttc-aggca          |

**TxKy-R**

|             |                                                                       |
|-------------|-----------------------------------------------------------------------|
| pPRATENSIS2 | <b>aTGGTT</b> GCGAAATATTTCATCCATATCTACGAGAAAGCTACCTAAAGCATTGACAGTGCTG |
| pCOMPRESSA  | aTGGTTGCGAAATATTTCATCCATATCTACGAGAAAGCTACCTAAAGCATTGACAGTGCTG         |
| pARACHNIF1  | aTGGTTGCAAAATATTTCATCCATATCTACGAGAAAGCTACCTAAAGCATTGACAGTGCTG         |
| pTRIVIALIS  | aTGGTTGCAAAATATTTCATCCATATCTACTAGAAAGCTACCTAAAGCATTGACAATGCTG         |
| pARACHNIF2  | aTGGTTGCAAAATATTTCATCCATATCTACTAGAAAGCTACCTAAAGCATTGACAGTGCTG         |
| pPRATENSIS1 | aTGGTTGCAAAATATTTCATCCATATCTACTAGAAAGCTACCTAAAGCATTGACAGTGCTG         |
| pANNUA1     | aTGGTTGCGAAATTTTCATCCATATNTACGCGAAAGCTACNTAAAGCATTGACAGTGCTG          |
| pINFIRMA    | aTGGTTGCGAAATACTCATCCATATCTACCCGAAAGCTATCTAAAGCATTGCTTGTGCTG          |
| pANNUA2     | aTGGTTGCGAAATACTCATCCATATCTACCCGAAAGCTATCTAAAGCATTGCTTGTGCTG          |
| pSUPINA     | aTGGTTGCGAAATATTTCATCCATATCTACGANGAAGCTACCAAAGCATTGACAGTGCTG          |
|             |                                                                       |
| pPRATENSIS2 | ACTCGTGATAAAACGATGGTTGCTACAAGTGACTACAATGACTTCCACAAGCTGGTGAAG          |
| pCOMPRESSA  | ACTCGTGATAAAACAATGGTTGCTACAAGTGACTACAATGACTTCCACAAGCTGGTGAAG          |
| pARACHNIF1  | ACTCGTGATAAAACGATGGTTGCTACAAGTGACTACAATGACTTCCACAAGCTGGTGAAG          |
| pTRIVIALIS  | ACTCGTGGNAAAACGATGGTTGCTACAAGCGACTACAATGACTTCCACAAGCTGGTGAAG          |
| pARACHNIF2  | ACTCGTGATAAAACGATGGTTGCTACAAGTGACTACAATGACTTCCACAAGCTGGTGAAG          |
| pPRATENSIS1 | ACCCGTGATAAAACGATGGTTGCTATAAGTGACTACAATGACTTCCACAAGCTGGTGAAG          |
| pANNUA1     | ACTCGTGGTAAAACGATGGTTGCTACAAGTGACTACAATGACTTCCACAAGCTGGTGAAG          |
| pINFIRMA    | ACTCGTGATAAAAAGATTGTTGCTACAAGTGACTATAACGACTTCCATAAAATGGGGAAA          |
| pANNUA2     | ACTCGTGATAAAAAGATGGTTGCTACAAGTGACTATAACGACTTCCATAAAATGGGGAAA          |
| pSUPINA     | ACTCGTGATAGAACGATGGTTGCTACAAGTGACTACAGTGACTTCCATAAAATGGGGAAA          |
|             |                                                                       |
| pPRATENSIS2 | CGCTTAGTTATGGCGGGCATGTTGGGTTCTGCTGCTCAGgta---taagtctta-catac          |
| pCOMPRESSA  | CGCTTAGTTATGGCGGGCATGTTGGGTTCTGCTGCTCAGgta---taagtctta-catac          |
| pARACHNIF1  | CGCTTAGTTATGGCGGGCATGTTGGGTTCTGCTGCTCAGgta---taagtctta-catac          |
| pTRIVIALIS  | CGCTTAGTTATGGCGGGCATGTTGGGTTCTGCTGCTCAGgta---taagtctta-catac          |
| pARACHNIF2  | CGCTTAGTTATGGCGGGCATGTTGGGTTCTGCTGCTCAGgta---taagtctta-catac          |
| pPRATENSIS1 | CGCTTAGTTATGGCGGGCATGTTGGGTTCTGCTGCTCAGgta---taagtctta-catac          |
| pANNUA1     | CGCTTAGTTATGGCGGGCATGTTAGGTTCTGCTGCTCAGgta---taagtctta-catac          |
| pINFIRMA    | CGTTTAGTTATCACGGGCATGTTAGGTTCTGCTGCTCAGgtagtataagtctta-catac          |
| pANNUA2     | CGTTTAGTTATCACGGGCATGTTAGGTTCTGCTGCTCAGgtagtataagtctta-catac          |
| pSUPINA     | CGTTTAGTTATCACGGGCATGTTAGGTTCTGCTGCCCAGgtagtataagtctta-catac          |
|             |                                                                       |
| pPRATENSIS2 | acagtttagttgccacctcttggatacgcttacactttcagttaactaatgtaccacaac          |
| pCOMPRESSA  | acagtttagttgccacctcttggatacgcttacactttcagttaactaatgtaccacaac          |
| pARACHNIF1  | acagtttagttgccacctcttggatacgcttacactttcagttaactaatgtaccacaac          |
| pTRIVIALIS  | actgtttagttgccacctcttggatacgcttacactttcaattaactaatgtaccacaac          |
| pARACHNIF2  | actgtttagttgccacctcttggatacgcttacactttcagttaactaatgtaccacaac          |
| pPRATENSIS1 | actgtttagttgccacctcttggatacgcttacactttgagttaactaatgtaccacaac          |
| pANNUA1     | acagtttagttgccaactcttggata-----actttcagttaactaatgtaccacaac            |
| pINFIRMA    | acaatttagctatcatatcgctgcctatgtttatacctt---ttaacaaattttccacaac         |
| pANNUA2     | acaatttagctatcatatcgctgcctatgtttatacctt---ttaacaaattttccacaac         |
| pSUPINA     | acaatttagctatcatatcgctgcctatgtttatacctt---ttaacaaattttccacaac         |
|             |                                                                       |
| pPRATENSIS2 | aaaaa-tgcttgcaaaaatatttAGAGACAATATCGGGACACAAGAGACACGATGATGGAT         |
| pCOMPRESSA  | aaaaa-tgcttgcaaaaatatttAGAGACAATATCGGGACACAAGAGACACGATGATGGAT         |
| pARACHNIF1  | aaaaa-tgcttgcaaaaatatttAGAGACAATTTCTGGGACACAAGAGACACGATGATGGAT        |
| pTRIVIALIS  | aaaaa-tgcttgcaaaaatgtttAGAGACAATTTCTGTGACACAAGAGACACGATGATGGAT        |
| pARACHNIF2  | aaaaa-tgcttgcaaaaatgtttAGAGACAATTTCTGGGACACAAGAGACACGATGATGGCT        |
| pPRATENSIS1 | aaaaa-tgcttgcaaaaatatttAGAGACAATTTCTGAGACACAAGAGACACGATGATGGAT        |
| pANNUA1     | aaaaaatgcttgcaaaaatatttAGAGACAATTTCTGGGACACAAGAGACACGATGATGGAT        |
| pINFIRMA    | aaaat-tgcacgaaaaaaatatttAGAAACAGTTTCTGGGACACAAGGGACACGATGATGGGT       |
| pANNUA2     | aaaat-tgcacgaaaaaaatatttAGAAACAGTTTCTGGGACACAAGGGACACGATGATGGGT       |
| pSUPINA     | aaaat-tgcacgaaaaaaatatttAGAAACAGTTTCTGGGACACAAGGGACACGATGATGGGT       |

|             |                                                               |
|-------------|---------------------------------------------------------------|
| pPRATENSIS2 | AACATGCTAAGCACTCTCCGTACGCTGGTCGATGATGACCCACATTCTCCCCTGAACTTC  |
| pCOMPRESSA  | AACATGCTAAGCACTCTCCGTACGCTGGTCGATGATGACCCACATTCTCCCCTGAACTTC  |
| pARACHNIF1  | AACATGCTAAGCACTCTCCGTACGCTGGTTGGTGACGACCCACATTCTCCCCTGAACTTC  |
| pTRIVIALIS  | AACATGCTAAGCACTCTCCGTACGCTGGTGAATGACGATCCACATTCTCCTCTGAACTTC  |
| pARACHNIF2  | AACATGATAAGCACTCTTAGTACACTGGTGAATGACGACCCACATTCTACCCCTGAACTTC |
| pPRATENSIS1 | AACATGCTAAGCACTCTCCGTACACTGGTGAATGACGGCCACAT-CTCCTCTGAACTTC   |
| pANNUA1     | AACATGCTAAGCACTCTCCGTACGCTGGTAAATGACGACCCACATTCTCCCCTGAACTTC  |
| pINFIRMA    | AACATGTTAAGCACTCTCCATACTCTGGTGAATGACGACCCACATTCTCCTCTCAACTTC  |
| pANNUA2     | AACATGTTAAGCACTCTCCATACTCTGGTGAATGACGACCCACATTCTCCTCTCAACTTC  |
| pSUPINA     | AACATGTTAAGCACTCTCCATACTCTGGTGAATGACGACCCACATTCTCCTCTCAACTTC  |

|             |                                                               |
|-------------|---------------------------------------------------------------|
| pPRATENSIS2 | AGAGAAGTTTTCAAGGACGAGCTGTTCCGCCTGTCCTTGGTCCAGGTAAGtctaaaatcg  |
| pCOMPRESSA  | AGAGAAGTTTTCAAGGACGAGCTGTTCCGCCTGTCCTTGGTCCAGGTAAGtctacaatcg  |
| pARACHNIF1  | AGAGAAGTTTTCAAGGATGAGCTGTTCCGCCTGTCCTTGGTCCAGGTAAGtctacaatcg  |
| pTRIVIALIS  | AGAGAAGTTTTCAAGGACGAGCTGTTCCGCCCTGTCCTTGGTACAGGTAAGtctacaatcc |
| pARACHNIF2  | AGAGAAATTTTTCAAGGACGAGCTGTTCCGCCTGTCCTTGTACAGGTAAGtctacaatcg  |
| pPRATENSIS1 | AGAGAAGTTTTCAAGGACGAGCTGTTCCGCCTGTCCTTGGTACAGGTAAGtctacaatca  |
| pANNUA1     | AGAGAAGTTTTCAAGGACGAGCTGTTCCGCCTGTCCTTGGTTCAGGCAAGtagacagttg  |
| pINFIRMA    | AGAGAAGTTTTTAAGGACGAAGCTGTTCCGCCTATCCTTGGTACAGGTAAGtagacaaatg |
| pANNUA2     | AGAGAAGTTTTTAAGGACGAAGCTGTTCCGCCTATCCTTGGTACAGGTAAGtagacaaatg |
| pSUPINA     | AGAGAAGTTTTTAAGGACGAAGCTGTTCCGCCTATCCTTGGTACAGGTAAGtagacaaatg |

|             |                                                              |
|-------------|--------------------------------------------------------------|
| pPRATENSIS2 | tcgtgatatggc-----gtgcttatc---ctta-gtatcacttttcttgatttgaatc   |
| pCOMPRESSA  | tcgtgatatggt-----gtgcttatc---ctta-gtatcacttttcttgatttgaatc   |
| pARACHNIF1  | tcgtgatatggc-----gtgttcacatc---ctta-gtatcacttttcttgatttgaatc |
| pTRIVIALIS  | tcgtgatatggc-----atgctcatc---ctta-gcatcaatttcttgatttgaatc    |
| pARACHNIF2  | tcgtgatatggc-----atgctcatc---ctta-gtatcacttttcttgatttgaatc   |
| pPRATENSIS1 | tcgtgatatgtc-----at-ctcatc---ctta-atacacttttcttgatttgaata    |
| pANNUA1     | tcgtgatatggt-----gtgctcatc---ctta-gtatcacttttcttcattgtgaatc  |
| pINFIRMA    | tcattgatatagcattatagcgtgctcatcgcgtaagcatcacttttgttgatttgaatc |
| pANNUA2     | tcattgatatagcattatagcgtgctcatcgcgtaagcatcacttttgttgatttgaatc |
| pSUPINA     | tcattgatatagcattatagcgtgctcatcgcgtaggcatcacttttgttgatttgaatc |

|             |                                                              |
|-------------|--------------------------------------------------------------|
| pPRATENSIS2 | a-----t-----tttgtgataccgataatg---gatgctgcaatttCA             |
| pCOMPRESSA  | aatcttcagatgcttaatttat--tttctgataccgataatg---gatgctgcaatttCA |
| pARACHNIF1  | agtcttcagatgcttaatttat--tttgtgataccgataatg---aatgctgcaatttCA |
| pTRIVIALIS  | aatcttcagatgggttaa-----tttgcgataccgataatg---gatgctgcaatttCA  |
| pARACHNIF2  | aatcctcagatgggttaa-----tttgcgatactgataatg---gatgctgcaatttCA  |
| pPRATENSIS1 | aatcttcagatgggttaa-----tttgtgataccgataatt---gatgctgcaatttCA  |
| pANNUA1     | aatgttcagatgggttaa-----ttaattatttggataatg---gatgctgcaatttCA  |
| pINFIRMA    | aaccttcagatgctttgtttatcattcgcgcatgctgagagggcacagtactgcatttCA |
| pANNUA2     | aaccttcagatgctttgtttaccattcgcgatactgagagggcacagtactgcatttCA  |
| pSUPINA     | aaccttcagatgctttgtttatcattcgcgatactgggagggcacagtactgcatttCA  |

|             |                                                                |
|-------------|----------------------------------------------------------------|
| pPRATENSIS2 | GAGCTTAGGTGAGGATGTGAGTTTCAGTCTATGTTAAGGAGTTTGGGAGGGAGGTATCAAA  |
| pCOMPRESSA  | GAGCTTAGGTGAGGATGTGAGTTTCAGTCTATGTTAAGGAGTTTGGGAGGGAGGTATCAAA  |
| pARACHNIF1  | GAGCTTAGGTGAGTATGTGAGTTTCAGTCTATGTTAAGGAGTTTCGGGAGGGAGGTATCAAA |
| pTRIVIALIS  | GAGCTTAGGTGAGGATGTAAGTTTCAGTTTATGTTAAGGAGTTTGGGAGGGAAATATCAAA  |
| pARACHNIF2  | GAGCTTAGGTGAGGATGTAAGTTTCAGTTTATGTTAAGGAGTTTGGGAGGGAAATATCAAA  |
| pPRATENSIS1 | GAGCTTAGGTGAGGATGTAAGTTTCAGTTTATGTTAAGGAGTTTGGGAGGGAAATATCAAA  |
| pANNUA1     | GAGCTTAGGTGAGGATGTAAGTTTCAGTCTATGTTAAGGAGTTTGGGAGGGAGATATCAAA  |
| pINFIRMA    | GAGCATAGGTGAGGACGTGAGTTTCAGTCTATGTTAAGGAGTTTGGGAGGGAGGTGTCAAA  |
| pANNUA2     | GAGCATAGGTGAGGACGTGAGTTTCAGTCTATGTTAAGGAGTTTGGGAGGGAGGTGTCAAA  |
| pSUPINA     | GAGCATAGGTGAGGACGTGAGTTTCAGTCTATGTTAAGGAGTTTGGGAGGGAGGTGTCAAA  |

|             |                                                                             |
|-------------|-----------------------------------------------------------------------------|
| pPRATENSIS2 | GGAAGAAATCTACCAGATCACTGTGGTTGACCTGATGATGTGCGCAATTGAGGTTGATTG                |
| pCOMPRESSA  | GGAAGAAATCTACCAGATCACTGTGGTTGACCTGATGATGTGTGCAATTGAGGTTGATTG                |
| pARACHNIF1  | GGAAGAAATCTACCAGATCACTGTGGTTGACTTGATGATGTGCGCAATTGAGGTTGATTG                |
| pTRIVIALIS  | GGAAGAAATCTACCAGGCCACGGTAGTTGACATGATGATGTGCGCAATTGAGGTTGATTG                |
| pARACHNIF2  | GGAAGAAATCTACCAGGCCACGGTAGTTGACATGATGATGTGCGCAATTGAGGTTGATTG                |
| pPRATENSIS1 | GGAAGAAATCTACCAGGCCACGGTGGTTGACATGATGATGTGCGCAATTGAGGTTGATTG                |
| pANNUA1     | GGAAGAAATCTACCAGGCCACGGTGGTTGACATGATGATGTGCGCAATTGAGGTTGATTG                |
| pINFIRMA    | GGAAGAAATGTACCAGGCCACGGTTGTTGACATCATGATGTGCGCAATTGAGGTTGATTG                |
| pANNUA2     | GGAAGAAATGTACCAGGCCACGGTTGTTGACATCATGATGTGCGCAATTGAGGTTGATTG                |
| pSUPINA     | GGAAGAAATGTACCAGGCCACGGTTGTTGACATCATGATG <b><u>TGCGCAATTGAGGTTGATTG</u></b> |
|             | <b>SUP-R</b>                                                                |
| pPRATENSIS2 | GAGGGATTTCTTCCCATACCTCAGCTGGGTTCCAAACAAGAGCTTCGAAACAAGAGT                   |
| pCOMPRESSA  | GAGGGATTTCTTCCCATACCTCAGCTGGGTTCCAAACAAGAGCTTCGAAACAAGAGT                   |
| pARACHNIF1  | GAGGGATTTCTTCCCATACCTCAGCTGGGTTCCAAACAAGAGCTTCGAAACAAGAGT                   |
| pTRIVIALIS  | GAGAGATTTCTTTCCCATACCTCAGCTGGGTTCCAAACAAGAGCTTCGAAACAAGAGT                  |
| pARACHNIF2  | GAGGGATTTCTTTCCCATACCTCAGCTGGGTTCCAAACAAGAGCTTCGAAACAAGAGT                  |
| pPRATENSIS1 | GAGGGATTTCTTTCCCATACCTCAGTTGGGTTCCAAACAAGAGCTTCGAAACAAGAGT                  |
| pANNUA1     | GAGGGATTTCTTCCCATACCTCAGCTGGGTTCCAAACAAGAGCTTCGAAACAAGAGT                   |
| pINFIRMA    | GAGGGATTTCTTCCCGTGCCTTAGCTGGGTTCCAAACAAGAGCTTCGAAACAAGAGT                   |
| pANNUA2     | GAGGGATTTCTTCCCGTGCCTTAGCTGGGTTCCAAACAAGAGCTTCGAAACAAGAGT                   |
| pSUPINA     | GAGGGATTTCTTCCCGTGCCTTAGCTGGGTTCC <b><u>AAACAAGAGCTTCGAAACAAGAGT</u></b>    |
|             | <b>KO-R</b>                                                                 |

**Figure S1.** A multiple sequence alignment of a partial genomic DNA sequence of the kaurene oxidase gene from *Poa* species performed using the ClustalW function in Mega 5. Uppercase nucleotides represent exon sequences corresponding to *H. vulgare* mRNA. Lowercase nucleotides represent putative intron sequences. Bold and underlined regions are the primer pairs (forward and reverse) designed to differentiate between *P. arachnifera* and (a) *P. pratensis* (TxKy), (b) *P. compressa* (TxComp), (c) *P. trivialis* (TxTri), and (d) *P. annua* (SUP-R) using CSIP (conserved intron scanning polymorphism) markers.
